# Supplementary material
Source: PubMed Central journal article supplement (PMC470773)
Supplement: pnas_101_26_9915__1.pdf [file pnas_101_26_9915__1.pdf]

# Genotype 1

# Genotype 2

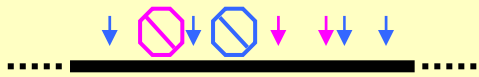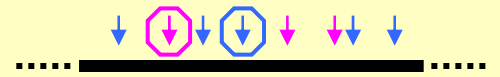

Cut with rare cutter (**PstI**) and frequent cutter (**BstNI**) & ligate to **PstI** adapter

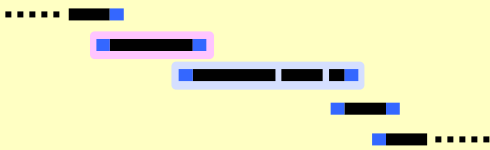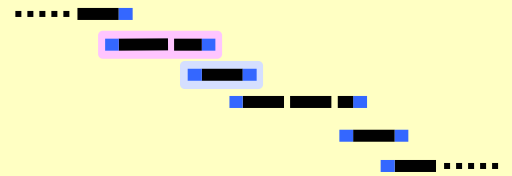

Amplify small adapter-ligated **PstI** fragments

**Polymorphic clones**

Genomic representation 1

Genomic representation 2

Label amplification products with **cy3**

Reference DNA for normalization labeled with **cy5** (= polylinker sequence of vector used to prepare library)

Mix and hybridize

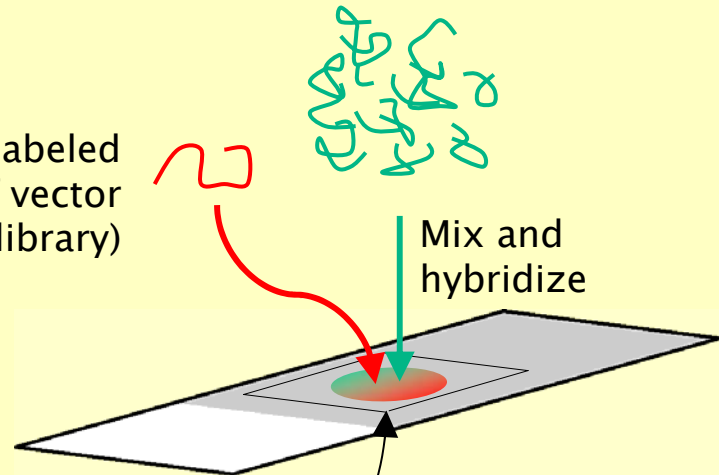

Array containing individual fragments of a library that was built from a representation prepared from a mixture of genomic DNA samples of a group of genotypes
